# Supplementary material for: Insights into the electrochemical properties of Li2FeS2 after FeS2 discharging
Source: Royal Society of Chemistry journal article supplement (doi:10.1039/d2cp05930d), 2023-01-01
Supplement: d2cp05930d1.pdf [file d2cp05930d1.pdf]

## “Supporting Information”

### Insights into Electrochemical Properties of $\text{Li}_2\text{FeS}_2$ after $\text{FeS}_2$ Discharging

Cheng-dong Wei<sup>a</sup>, Hong-tao Xue<sup>a, b</sup>, Xu-dong Zhao<sup>a</sup>, Fu-ling Tang<sup>a, b \*</sup>

<sup>a</sup> School of Materials Science and Engineering, Lanzhou University of Technology, Lanzhou 730050, China

<sup>b</sup> State Key Laboratory of Advanced Processing and Recycling of Non-ferrous Metals, Lanzhou University of Technology, Lanzhou 730050, China

\* Corresponding author.

E-mail address: tfl@lut.edu.cn (F. L. Tang)

**Figure S1** Relaxed crystal structure for  $\text{Li}_2\text{FeS}_2$  (a),  $\text{LiFeS}_2$  (b),  $\text{Li}_{0.5}\text{FeS}_2$  (c),  $\text{Li}_{0.375}\text{FeS}_2$  (d),  $\text{Li}_{0.25}\text{FeS}_2$  (e), and  $\text{FeS}_2$  (f) (yellow represents S atom, pink represents Fe atom, and green is for Li atom).

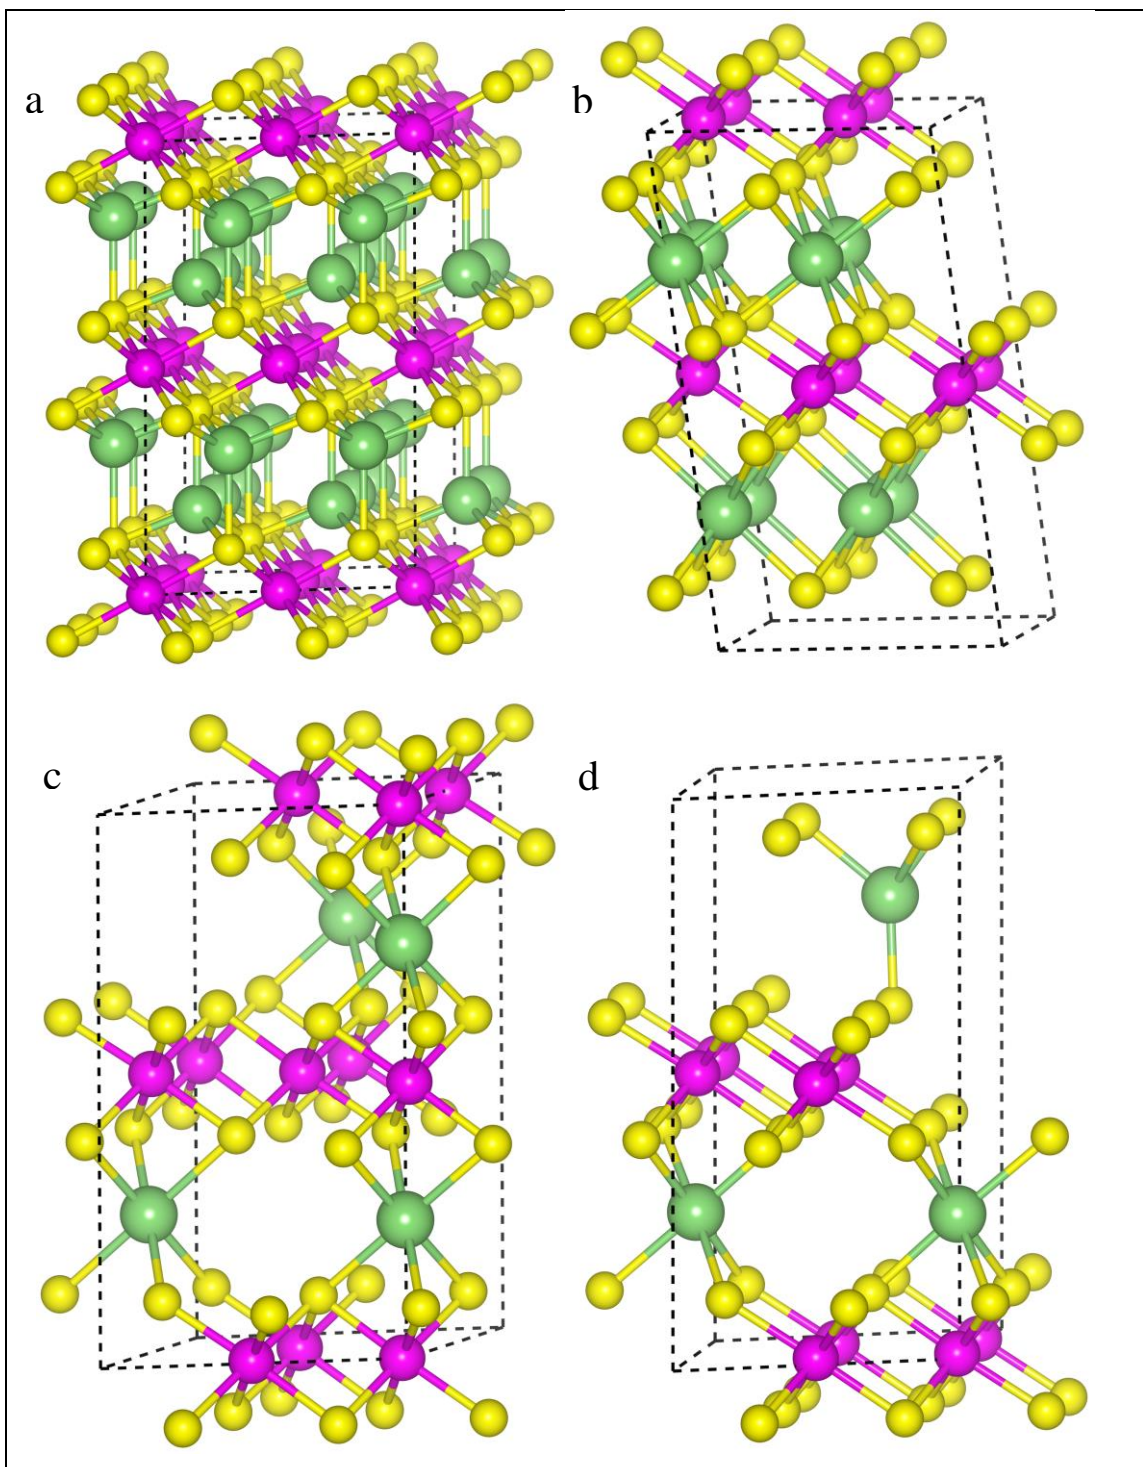

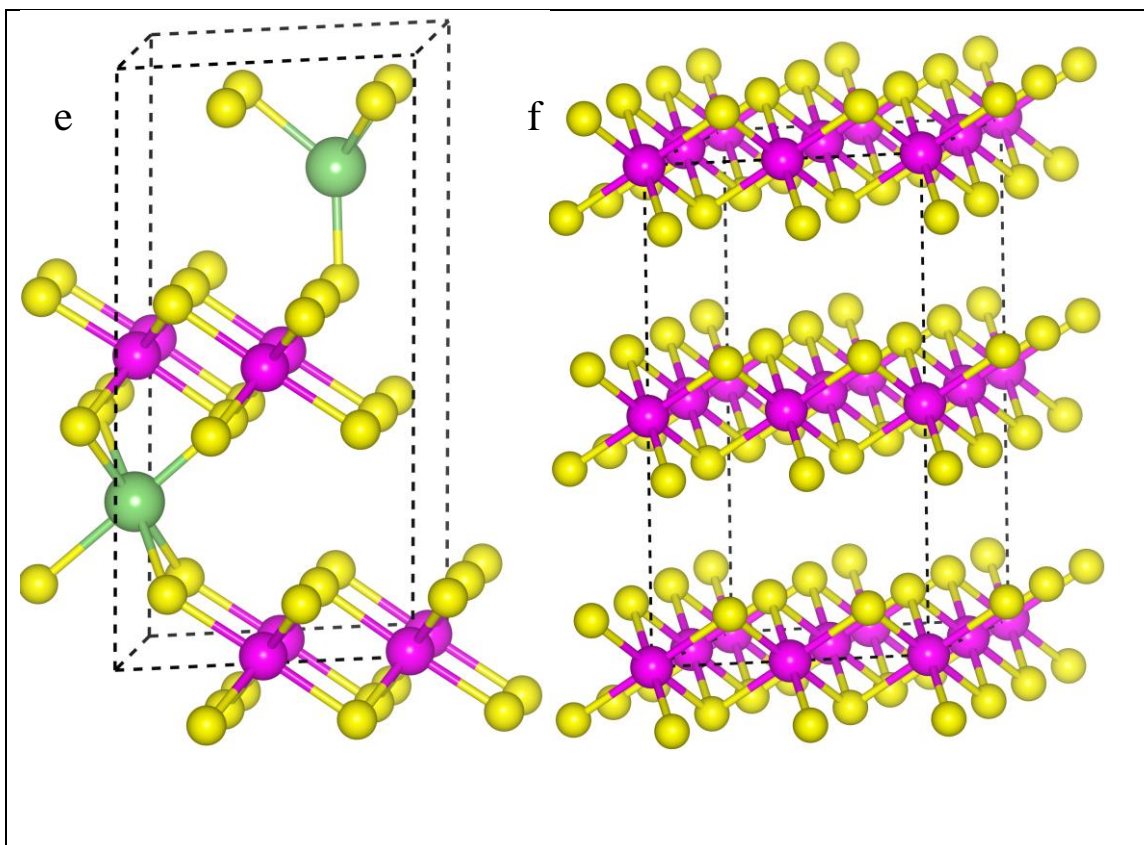

**Table S1** Crystal structure parameters and atomic position information for  $\text{Li}_{1-x}\text{Fe}_{0.5}\text{S}$ 

| Space group                        | $a$           | $b$      | $c$       | $\alpha$ | $\beta$  | $\gamma$  |
|------------------------------------|---------------|----------|-----------|----------|----------|-----------|
| $P-1$ (C1-1)                       | 6.70973       | 6.71186  | 11.72047  | 97.36578 | 90.59246 | 118.61884 |
|                                    | Atom position |          |           |          |          |           |
| LiFeS <sub>2</sub>                 | Li1           | 0.484309 | 0.030549  | 0.749280 |          |           |
|                                    | Li2           | 0.237871 | 0.027700  | 0.248394 |          |           |
|                                    | Li3           | 0.984581 | 0.529524  | 0.749228 |          |           |
|                                    | Li4           | 0.982723 | 0.033212  | 0.750727 |          |           |
|                                    | Li5           | 0.732116 | 0.532706  | 0.250707 |          |           |
|                                    | Li6           | 0.231491 | 0.528659  | 0.250121 |          |           |
|                                    | Li7           | 0.483264 | 0.534016  | 0.750696 |          |           |
|                                    | Li8           | 0.739117 | 0.033855  | 0.250877 |          |           |
|                                    | S1            | 0.376730 | 0.314265  | 0.105408 |          |           |
|                                    | S2            | 0.674963 | 0.910312  | 0.892132 |          |           |
|                                    | S3            | 0.876772 | 0.814158  | 0.105430 |          |           |
|                                    | S4            | 0.175054 | 0.410221  | 0.892117 |          |           |
|                                    | S5            | 0.876460 | 0.314493  | 0.106173 |          |           |
|                                    | S6            | 0.175248 | 0.909488  | 0.891912 |          |           |
|                                    | S7            | 0.293161 | 0.153050  | 0.608166 |          |           |
|                                    | S8            | 0.591361 | 0.748339  | 0.394008 |          |           |
|                                    | S9            | 0.793320 | 0.652968  | 0.608103 |          |           |
|                                    | S10           | 0.092505 | 0.247849  | 0.393927 |          |           |
|                                    | S11           | 0.793453 | 0.152291  | 0.607817 |          |           |
|                                    | S12           | 0.091892 | 0.748274  | 0.394524 |          |           |
|                                    | S13           | 0.675504 | 0.409609  | 0.891857 |          |           |
|                                    | S14           | 0.377680 | 0.813920  | 0.105973 |          |           |
|                                    | S15           | 0.591924 | 0.248257  | 0.394558 |          |           |
|                                    | S16           | 0.293555 | 0.652444  | 0.607854 |          |           |
| Fe1                                | 0.025613      | 0.112133 | -0.001776 |          |          |           |
| Fe2                                | 0.525993      | 0.611806 | 0.998012  |          |          |           |
| Fe3                                | 0.026142      | 0.611966 | 0.998539  |          |          |           |
| Fe4                                | 0.525754      | 0.111818 | 0.998463  |          |          |           |
| Fe5                                | 0.942659      | 0.950465 | 0.501534  |          |          |           |
| Fe6                                | 0.443009      | 0.450749 | 0.501626  |          |          |           |
| Fe7                                | 0.943087      | 0.450279 | 0.501726  |          |          |           |
| Fe8                                | 0.442693      | 0.950624 | 0.501888  |          |          |           |
| $C2$ (C2-3)                        | 6.77678       | 6.77678  | 12.05878  | 89.49691 | 90.50309 | 120.01967 |
|                                    | Atom position |          |           |          |          |           |
| Li <sub>0.5</sub> FeS <sub>2</sub> | Li1           | 0.997924 | 0.997758  | 0.750003 |          |           |
|                                    | Li2           | 0.997757 | 0.997923  | 0.249997 |          |           |
|                                    | Li3           | 0.002506 | 0.499865  | 0.749873 |          |           |
|                                    | Li4           | 0.499866 | 0.002507  | 0.250127 |          |           |
|                                    | S1            | 0.314421 | 0.147623  | 0.105481 |          |           |
|                                    | S2            | 0.656855 | 0.819311  | 0.890484 |          |           |
|                                    | S3            | 0.819310 | 0.656854  | 0.109516 |          |           |
|                                    | S4            | 0.147624 | 0.314422  | 0.894519 |          |           |
|                                    | S5            | 0.822442 | 0.146994  | 0.108414 |          |           |
| S6                                 | 0.146995      | 0.822443 | 0.891586  |          |          |           |
| S7                                 | 0.343012      | 0.180982 | 0.609579  |          |          |           |
| S8                                 | 0.685124      | 0.852792 | 0.394720  |          |          |           |
| S9                                 | 0.852792      | 0.685123 | 0.605280  |          |          |           |

|                                 |         |         |               |          |           |           |
|---------------------------------|---------|---------|---------------|----------|-----------|-----------|
|                                 |         | S10     | 0.180983      | 0.343013 | 0.390421  |           |
|                                 |         | S11     | 0.853209      | 0.177597 | 0.608391  |           |
|                                 |         | S12     | 0.177598      | 0.853210 | 0.391609  |           |
|                                 |         | S13     | 0.654862      | 0.323783 | 0.896926  |           |
|                                 |         | S14     | 0.323782      | 0.654861 | 0.103074  |           |
|                                 |         | S15     | 0.676705      | 0.345625 | 0.396914  |           |
|                                 |         | S16     | 0.345624      | 0.676704 | 0.603086  |           |
|                                 |         | Fe1     | 0.979312      | 0.979312 | 0.000000  |           |
|                                 |         | Fe2     | 0.490200      | 0.490200 | -0.000000 |           |
|                                 |         | Fe3     | 0.983846      | 0.488250 | 0.004285  |           |
|                                 |         | Fe4     | 0.488250      | 0.983846 | 0.995714  |           |
|                                 |         | Fe5     | 0.020540      | 0.020540 | 0.500000  |           |
|                                 |         | Fe6     | 0.509942      | 0.509942 | 0.500000  |           |
|                                 |         | Fe7     | 0.016721      | 0.511799 | 0.495601  |           |
|                                 |         | Fe8     | 0.511799      | 0.016721 | 0.504399  |           |
| <i>CM (CS-3)</i>                | 6.78089 | 6.74430 | 12.50521      | 89.84618 | 90        | 120.17960 |
|                                 |         |         | Atom position |          |           |           |
|                                 |         | Li1     | 0.996210      | 0.992419 | 0.253119  |           |
|                                 |         | Li2     | 0.329878      | 0.659754 | 0.783288  |           |
|                                 |         | Li3     | 0.503545      | 0.007090 | 0.251925  |           |
|                                 |         | S1      | 0.325627      | 0.155239 | 0.112296  |           |
|                                 |         | S2      | 0.667125      | 0.832654 | 0.907907  |           |
|                                 |         | S3      | 0.832731      | 0.665463 | 0.113448  |           |
|                                 |         | S4      | 0.163253      | 0.326506 | 0.909865  |           |
|                                 |         | S5      | 0.829612      | 0.155239 | 0.112296  |           |
|                                 |         | S6      | 0.165528      | 0.832654 | 0.907907  |           |
|                                 |         | S7      | 0.336513      | 0.171763 | 0.594682  |           |
|                                 |         | S8      | 0.668938      | 0.842149 | 0.390213  |           |
|                                 |         | S9      | 0.833119      | 0.666238 | 0.592760  |           |
|                                 |         | S10     | 0.169777      | 0.339553 | 0.390306  |           |
| $\text{Li}_{0.375}\text{FeS}_2$ |         | S11     | 0.835249      | 0.171763 | 0.594682  |           |
|                                 |         | S12     | 0.173211      | 0.842149 | 0.390213  |           |
|                                 |         | S13     | 0.664815      | 0.329630 | 0.908254  |           |
|                                 |         | S14     | 0.331813      | 0.663627 | 0.113134  |           |
|                                 |         | S15     | 0.669951      | 0.339902 | 0.390619  |           |
|                                 |         | S16     | 0.336193      | 0.672387 | 0.590585  |           |
|                                 |         | Fe1     | 0.995389      | 0.990778 | 0.008655  |           |
|                                 |         | Fe2     | 0.500409      | 0.497624 | 0.011802  |           |
|                                 |         | Fe3     | -0.002784     | 0.497624 | 0.011802  |           |
|                                 |         | Fe4     | 0.496568      | 0.993136 | 0.008511  |           |
|                                 |         | Fe5     | 0.003793      | 0.007584 | 0.494497  |           |
|                                 |         | Fe6     | 0.501791      | 0.500349 | 0.491386  |           |
|                                 |         | Fe7     | -0.001442     | 0.500349 | 0.491386  |           |
|                                 |         | Fe8     | 0.506520      | 0.013040 | 0.494875  |           |
| <i>CM (CS-3)</i>                | 6.78089 | 6.74430 | 12.50521      | 89.84618 | 90        | 120.17960 |
|                                 |         |         | Atom position |          |           |           |
|                                 |         | Li1     | 0.329878      | 0.659754 | 0.783288  |           |
|                                 |         | Li2     | 0.503545      | 0.007090 | 0.251925  |           |
|                                 |         | S1      | 0.325627      | 0.155239 | 0.112296  |           |
| $\text{Li}_{0.25}\text{FeS}_2$  |         | S2      | 0.667125      | 0.832654 | 0.907907  |           |
|                                 |         | S3      | 0.832731      | 0.665463 | 0.113448  |           |
|                                 |         | S4      | 0.163253      | 0.326506 | 0.909865  |           |
|                                 |         | S5      | 0.829612      | 0.155239 | 0.112296  |           |

|                  |         |           |               |           |    |     |
|------------------|---------|-----------|---------------|-----------|----|-----|
|                  | S6      | 0.165528  | 0.832654      | 0.907907  |    |     |
|                  | S7      | 0.336513  | 0.171763      | 0.594682  |    |     |
|                  | S8      | 0.668938  | 0.842149      | 0.390213  |    |     |
|                  | S9      | 0.833119  | 0.666238      | 0.592760  |    |     |
|                  | S10     | 0.169777  | 0.339553      | 0.390306  |    |     |
|                  | S11     | 0.835249  | 0.171763      | 0.594682  |    |     |
|                  | S12     | 0.173211  | 0.842149      | 0.390213  |    |     |
|                  | S13     | 0.664815  | 0.329630      | 0.908254  |    |     |
|                  | S14     | 0.331813  | 0.663627      | 0.113134  |    |     |
|                  | S15     | 0.669951  | 0.339902      | 0.390619  |    |     |
|                  | S16     | 0.336193  | 0.672387      | 0.590585  |    |     |
|                  | Fe1     | 0.995389  | 0.990778      | 0.008655  |    |     |
|                  | Fe2     | 0.500409  | 0.497624      | 0.011802  |    |     |
|                  | Fe3     | -0.002784 | 0.497624      | 0.011802  |    |     |
|                  | Fe4     | 0.496568  | 0.993136      | 0.008511  |    |     |
|                  | Fe5     | 0.003793  | 0.007584      | 0.494497  |    |     |
|                  | Fe6     | 0.501791  | 0.500349      | 0.491386  |    |     |
|                  | Fe7     | -0.001442 | 0.500349      | 0.491386  |    |     |
|                  | Fe8     | 0.506520  | 0.013040      | 0.494875  |    |     |
| <i>P-3M1</i>     | 6.66862 | 6.66862   | 11.84888      | 90        | 90 | 120 |
|                  |         |           | Atom position |           |    |     |
|                  | Fe1     | -0.000000 | -0.000000     | -0.000000 |    |     |
|                  | Fe2     | 0.500000  | -0.000000     | -0.000000 |    |     |
|                  | Fe3     | -0.000000 | 0.500000      | -0.000000 |    |     |
|                  | Fe4     | 0.500000  | 0.500000      | -0.000000 |    |     |
|                  | Fe5     | -0.000000 | -0.000000     | 0.500000  |    |     |
|                  | Fe6     | 0.500000  | -0.000000     | 0.500000  |    |     |
|                  | Fe7     | -0.000000 | 0.500000      | 0.500000  |    |     |
|                  | Fe8     | 0.500000  | 0.500000      | 0.500000  |    |     |
|                  | S1      | 0.333333  | 0.166667      | 0.891324  |    |     |
|                  | S2      | 0.666667  | 0.833333      | 0.108676  |    |     |
|                  | S3      | 0.833333  | 0.166667      | 0.891324  |    |     |
|                  | S4      | 0.166667  | 0.833333      | 0.108676  |    |     |
| FeS <sub>2</sub> | S5      | 0.833333  | 0.666667      | 0.891324  |    |     |
|                  | S6      | 0.166667  | 0.333333      | 0.108676  |    |     |
|                  | S7      | 0.333333  | 0.166667      | 0.391324  |    |     |
|                  | S8      | 0.666667  | 0.833333      | 0.608676  |    |     |
|                  | S9      | 0.833333  | 0.166667      | 0.391324  |    |     |
|                  | S10     | 0.166667  | 0.833333      | 0.608676  |    |     |
|                  | S11     | 0.833333  | 0.666667      | 0.391324  |    |     |
|                  | S12     | 0.166667  | 0.333333      | 0.608676  |    |     |
|                  | S13     | 0.666667  | 0.333333      | 0.108676  |    |     |
|                  | S14     | 0.333333  | 0.666667      | 0.891324  |    |     |
|                  | S15     | 0.666667  | 0.333333      | 0.608676  |    |     |
|                  | S16     | 0.333333  | 0.666667      | 0.391324  |    |     |

**Figure S2** The crystal structure (a) and density of states (b) for FeS<sub>2</sub> (yellow represents S atom, pink represents Fe atom).

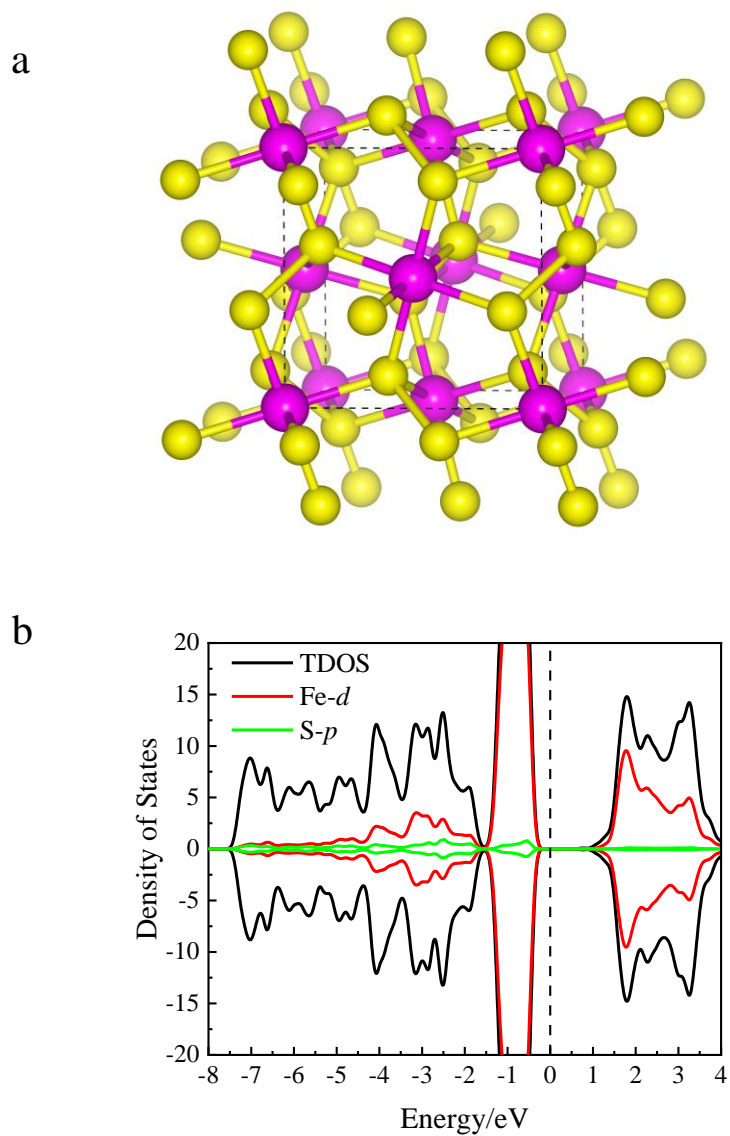

**Figure S3** Li/Li-vacancy Frenkel defect pairs for  $\text{Li}_2\text{FeS}_2$

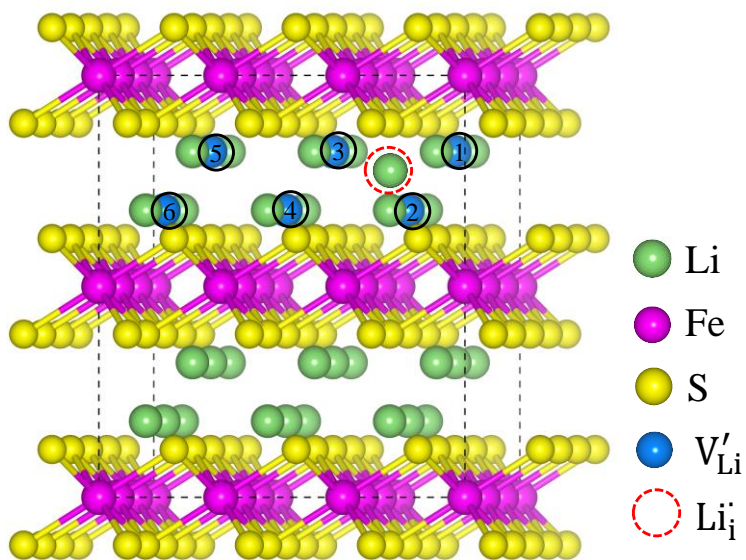

**Table S2** Different energy for Li/Li-vacancy Frenkel defect pairs in  $\text{Li}_2\text{FeS}_2$

| Defect types                                         | Defect sites | Defect pairs distance ( $\text{\AA}$ ) | Defect energy (eV) |
|------------------------------------------------------|--------------|----------------------------------------|--------------------|
| Frenkel defect<br>( $V'_{\text{Li}} - \text{Li}_i$ ) | 1            | 4.408                                  | -419.066           |
|                                                      | 2            | 2.476                                  | -419.103           |
|                                                      | 3            | 2.209                                  | -419.176           |
|                                                      | 4            | 2.409                                  | -419.182           |
|                                                      | 5            | 4.346                                  | -419.146           |
|                                                      | 6            | 5.740                                  | -418.993           |



**Figure S4** Li<sub>2</sub>S Schottkt defect pairs for Li<sub>2</sub>FeS<sub>2</sub>

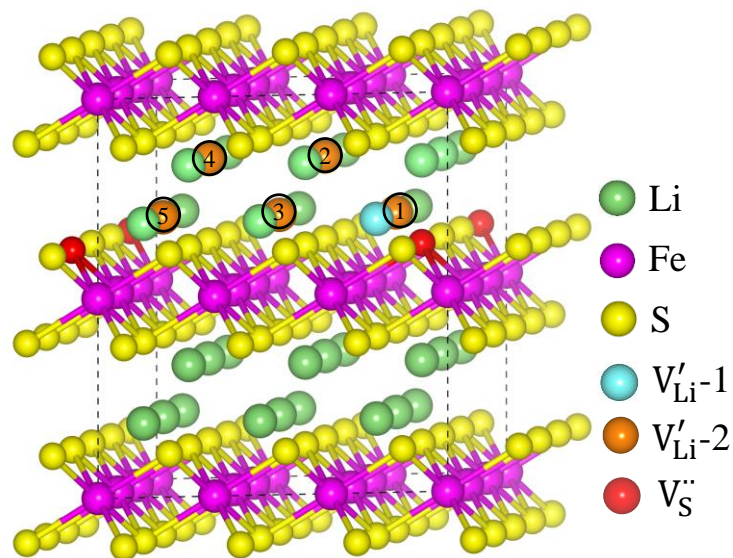

**Table S3** Different energy for Li<sub>2</sub>S Schottkt defect pairs in Li<sub>2</sub>FeS<sub>2</sub>

| Defect types                                              | Defect sites | Defect pairs distance (Å) |       | Defect energy (eV) |
|-----------------------------------------------------------|--------------|---------------------------|-------|--------------------|
|                                                           |              | Li-1                      | Li-2  |                    |
| Schottky defect<br>( $2V'_{\text{Li}} - V''_{\text{S}}$ ) | 1            | 2.189                     | 2.145 | -406.37            |
|                                                           | 2            | 2.189                     | 4.438 | -405.74            |
|                                                           | 3            | 2.189                     | 4.257 | -405.82            |
|                                                           | 4            | 2.189                     | 6.791 | -405.78            |
|                                                           | 5            | 2.189                     | 7.699 | -405.88            |
